# Supplementary material for: Structural and Functional Comparison of Salmonella Flagellar Filaments Composed of FljB and FliC
Source: MDPI journal article supplement (doi:10.3390/biom10020246), 2020-02-06
Supplement: s1 [file s1]

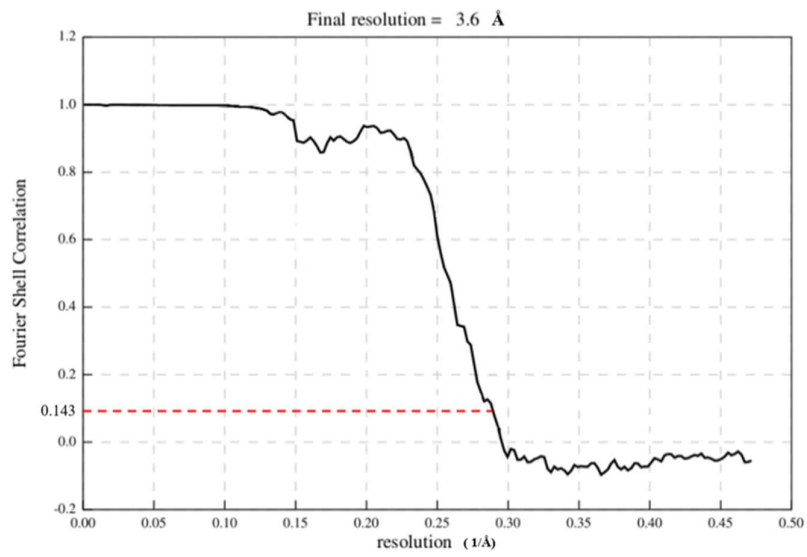

**Figure 1.** Fourier shell correlation of the 3D reconstruction.

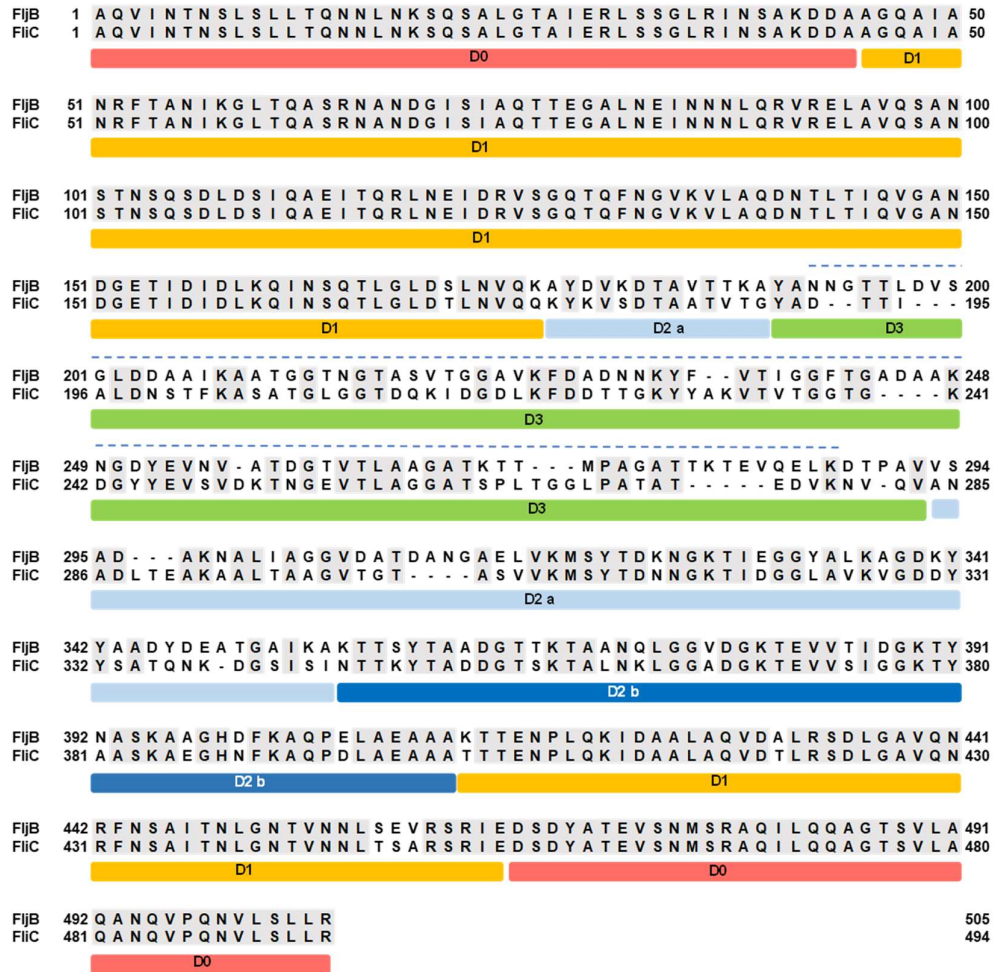

**Figure 2.** Amino acid sequence alignment of FljB and FliC. The amino acid sequence of FljB and FliC shows 76% identity and  $1.4 \times 10^{-66}$  *E*-value. Conserved residues are shaded in gray. The regions of domains are indicated by bars and labels in different colors underneath the sequence (D0, red; D1, orange; D2a, right blue; D2b, dark blue; D3, green). The dashed line above the sequence indicates the missing regions of the FljB model (6JY0).

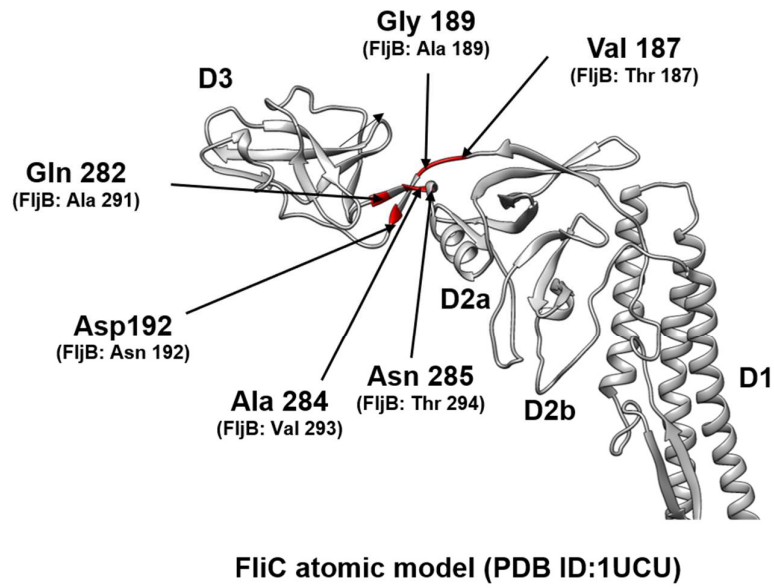

**Figure 3.** Differences in residue numbers and types between FliC and FljB mapped on the FliC model. Differences are shown for residues 187 – 192 and 282 – 285 of FliC and residues 187 – 192 and 291 – 294 of FljB. The FliC chain is colored red for those residues that are different from FljB.

**Table S1.** Summary of cryoEM data collection and image analysis

| <b>Data collection</b>                            |                       |
|---------------------------------------------------|-----------------------|
| Microscope                                        | Titan Krios           |
| Camera                                            | Falcon II             |
| Data acquisition                                  | Auto / EPU            |
| Voltage (kV)                                      | 300                   |
| Magnification                                     | 75,000                |
| Pixel size (Å)                                    | 1.06                  |
| Defocus range (µm)                                | 0.2 -1.9              |
| Frame rate (sec/frame)                            | 0.1                   |
| Total exposure time (sec)                         | 2                     |
| Number of frames                                  | 7                     |
| Dose rate (e <sup>-</sup> /Å <sup>2</sup> /frame) | 10.3                  |
| Total dose (e <sup>-</sup> /Å)                    | 72.1                  |
| <b>Particle statistics</b>                        |                       |
| Number of micrographs                             | 2,319                 |
| Number of picked segments                         | 197,442 (90% overlap) |
| Number of segments (final)                        | 114,110               |
| Resolution (Å)                                    | 3.6                   |
| FSC threshold                                     | 0.143                 |
| <b>Ramachandran plot</b>                          |                       |
| Favored (%)                                       | 94                    |
| Allowed (%)                                       | 6                     |
| Outliers (%)                                      | 1                     |
